# Supplementary material for: Vacuum-free electric arc synthesis of titanium carbide using plant waste-derived carbon
Source: Royal Society of Chemistry journal article supplement (doi:10.1039/d3nj02598e), 2023-01-01
Supplement: d3nj02598e1.pdf [file d3nj02598e1.pdf]

## Supplementary

Table S1 – Technical characteristics of the initial biomass components and the resulting biocarbon

| Raw material                | A <sup>d</sup> | W <sup>a</sup> | V <sup>daf</sup> | Q <sub>v</sub> |
|-----------------------------|----------------|----------------|------------------|----------------|
|                             | wt. %          |                |                  | MJ/kg          |
| Starting material (biomass) | 2.63           | 5.0            | 80.13            | 15.86          |
| Biomass-derived carbon      | 7.89           | 1.2            | 18.20            | 25.92          |

where:

- Wa – moisture;
- Ad – ash content;
- Vdaf – volatile matter;

- Q – calorific value.

Figure S2 presents the measurement results for the bio char specific surface area.

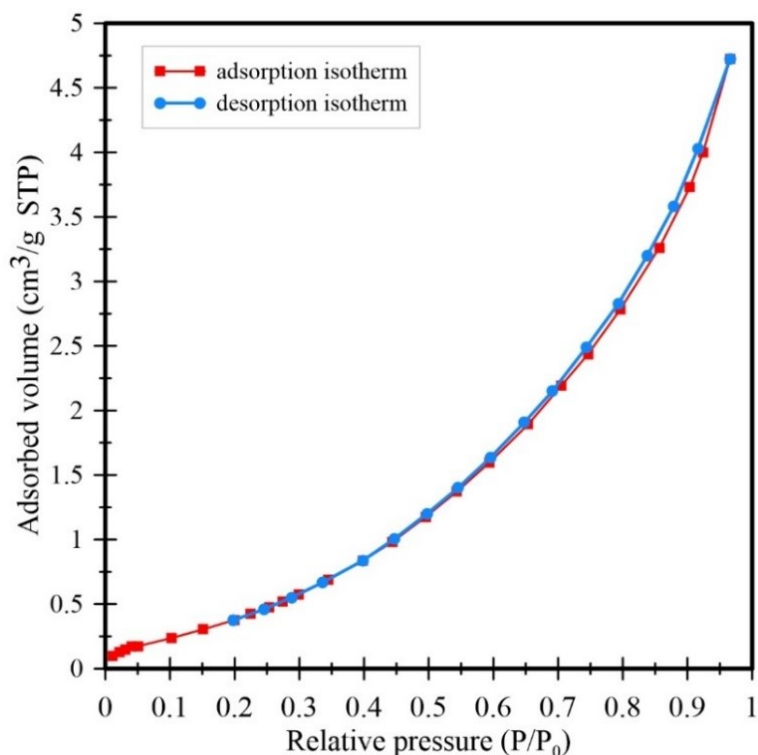

Figure S1 – Adsorption-desorption isotherms for carbon residue from pomelo peel pyrolysis

The pattern of the isotherm in the relative pressure range from 0 to 0.1  $p/p_0$  is related to a relatively small number of micropores in the sample for carbon materials. The specific surface area of the sample attained 1.3  $m^2/g$ . Table S3 presents the pore size distribution. The analysis results show that the average pore diameter is 23.2 nm, which corresponds to that of mesoporous materials.

Table S2 – Pore size distribution

| No. | Pore size, nm | Pore volume, cm <sup>3</sup> /g | Percentage, % |
|-----|---------------|---------------------------------|---------------|
| 1   | 2.00-10.00    | 0.00587                         | 62.97         |
| 2   | 10.00-20.00   | 0.00184                         | 19.78         |
| 3   | 20.00-50.00   | 0.00161                         | 17.25         |
| 4   | >50           | -                               | -             |

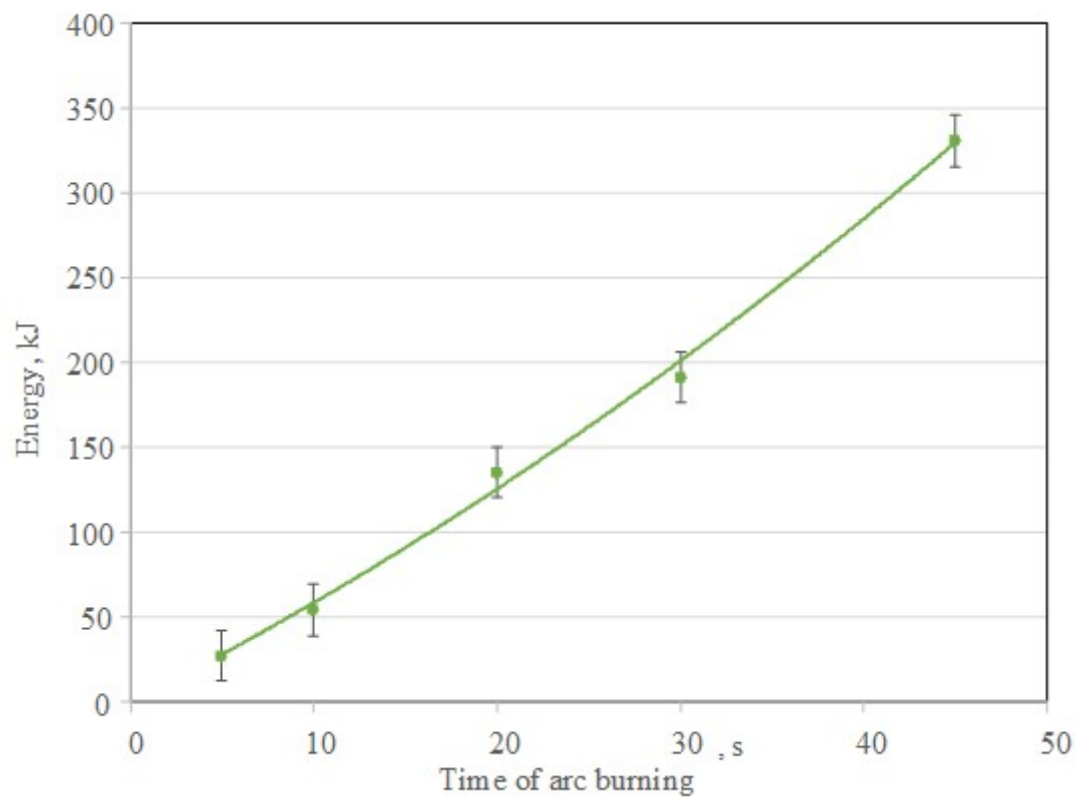

Figure S2 – Energy parameters of the arc reactor
